# Supplementary material for: CYP6AE gene cluster knockout in Helicoverpa armigera reveals role in detoxification of phytochemicals and insecticides
Source: PubMed Central journal article supplement (PMC6240031; doi:10.1038/s41467-018-07226-6), 2018-11-16
Supplement: 41467_2018_7226_MOESM1_ESM.pdf [file 41467_2018_7226_MOESM1_ESM.pdf]

## **Supplementary Information**

CYP6AE gene cluster knockout in *Helicoverpa armigera* reveals role in detoxification of phytochemicals and insecticides.

Wang et al.

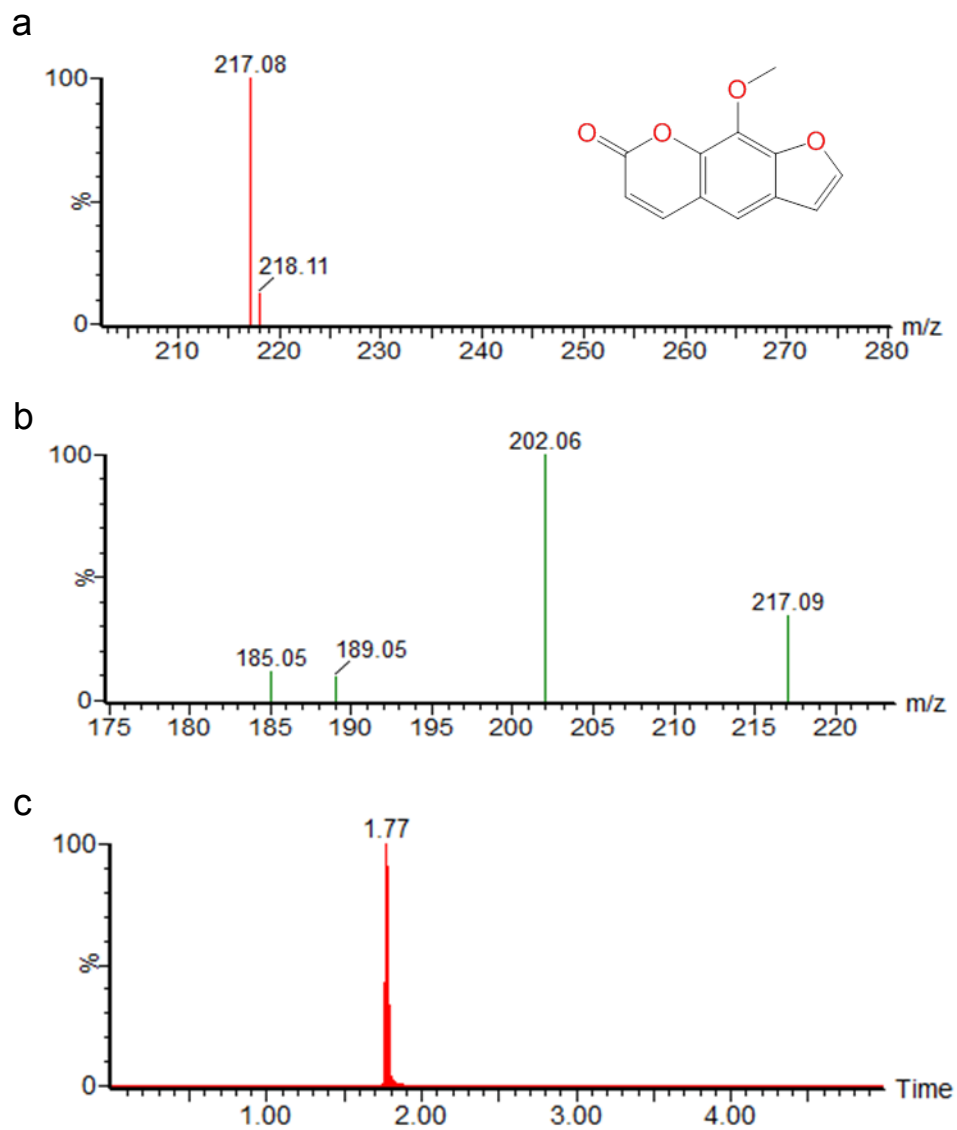

**Supplementary Figure 1.** Detection of xanthotoxin by UPLC-MS/MS. **a.** Full scan of xanthotoxin. **b.** Fragments found in MS/MS spectrum. **c.** MRM spectrum of xanthotoxin. Xanthotoxin eluted at 1.77min.

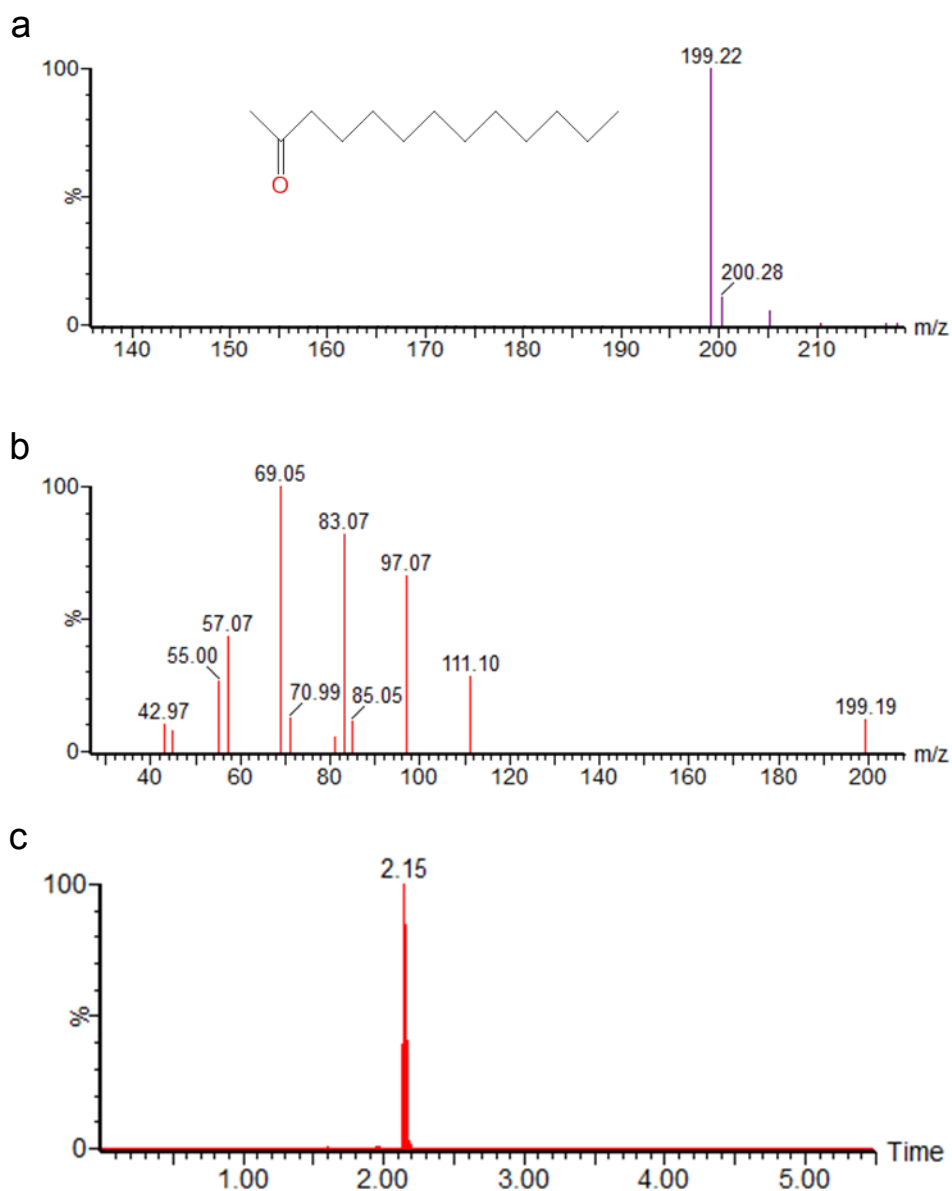

**Supplementary Figure 2.** Detection of 2-tridecanone by UPLC-MS/MS. **a.** Full scan of 2-tridecanone. **b.** Fragments found in MS/MS spectrum. **c.** MRM spectrum of 2-tridecanone. 2-tridecanone eluted at 2.15min.

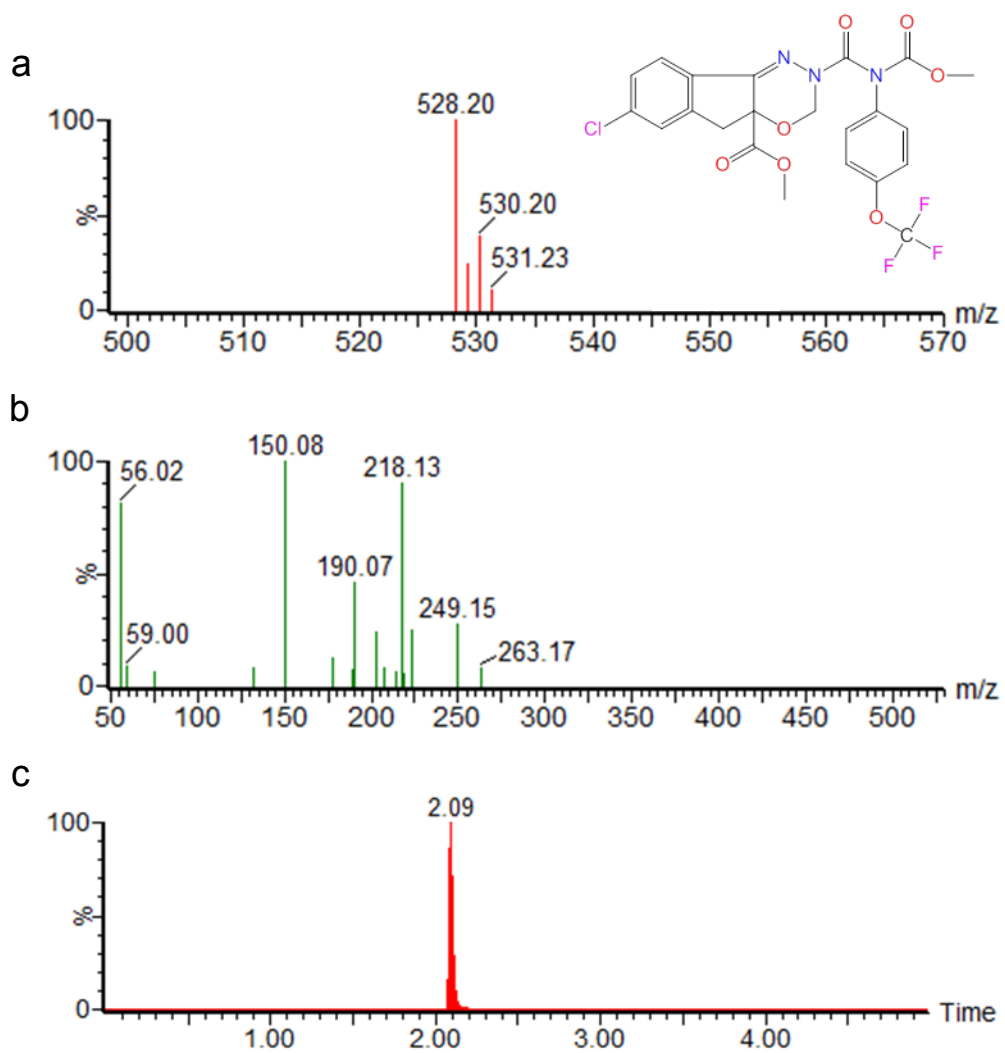

**Supplementary Figure 3.** Detection of indoxacarb by UPLC-MS/MS. **a.** Full scan of indoxacarb. **b.** Fragments found in MS/MS spectrum. **c.** MRM spectrum of indoxacarb. Indoxacarb eluted at 2.09min.

**Supplementary Table 1**

Susceptibility of newly-hatched larvae of the unedited (SCD) and CYP6AE knockout strains (SCD-d6AE) of *H. armigera* to diverse phytochemicals.

| Plant allelochemical | Strain   | LC <sub>50</sub> (mg/g) | 95% FL (mg/g) | Slope±SE  | Toxicity ratio |
|----------------------|----------|-------------------------|---------------|-----------|----------------|
| Xanthotoxin          | SCD      | 7.00                    | 4.94-9.32     | 3.24±0.35 | 4.1            |
|                      | SCD-d6AE | 1.73                    | 1.50-1.92     | 5.87±0.86 |                |
| Gossypol acetate     | SCD      | 5.30                    | 4.33-6.49     | 4.13±0.93 | 1.2            |
|                      | SCD-d6AE | 4.31                    | 2.25-6.02     | 3.68±0.89 |                |
| 2-Tridecanone        | SCD      | 3.28                    | 2.87-3.62     | 6.78±1.18 | 1.4            |
|                      | SCD-d6AE | 2.38                    | 1.91-2.69     | 6.61±1.36 |                |
| Nicotine             | SCD      | 1.64                    | 1.36-1.93     | 9.26±2.10 | 1.0            |
|                      | SCD-d6AE | 1.60                    | 1.24-1.93     | 8.46±2.24 |                |
| Coumarin             | SCD      | 1.87                    | 1.54-2.24     | 4.71±0.84 | 1.1            |
|                      | SCD-d6AE | 1.65                    | 0.90-2.08     | 5.37±1.75 |                |

LC<sub>50</sub>, lethal concentration that kills 50% of *H. armigera* larvae; 95% FL, 95% fiducial limits of LC<sub>50</sub>; Toxicity ratio was calculated as LC<sub>50</sub> of SCD/LC<sub>50</sub> of SCD-d6AE; LC<sub>50</sub> values were considered significantly different if their fiducial limits did not overlap<sup>1</sup>.

**Supplementary Table 2**

Susceptibility of second instar larvae of the unedited (SCD) and CYP6AE knockout strains (SCD-d6AE) of *H. armigera* to diverse insecticides.

| Insecticide         | Strain   | LC <sub>50</sub><br>(mg/L) | 95% FL<br>(mg/L) | Slope±SE  | Toxicity<br>ratio |
|---------------------|----------|----------------------------|------------------|-----------|-------------------|
| Esfenvalerate       | SCD      | 5.13                       | 3.97-6.23        | 2.85±0.43 | 4.5               |
|                     | SCD-d6AE | 1.14                       | 0.82-1.64        | 1.80±0.16 |                   |
| Indoxacarb          | SCD      | 5.12                       | 4.52-5.84        | 2.91±0.29 | 3.1               |
|                     | SCD-d6AE | 1.64                       | 1.84-2.34        | 2.35±0.26 |                   |
| Emamectin benzoate  | SCD      | 0.015                      | 0.010-0.022      | 5.47±0.68 | 1.0               |
|                     | SCD-d6AE | 0.015                      | 0.013-0.016      | 9.81±1.70 |                   |
| Chlorantraniliprole | SCD      | 1.20                       | 0.87-1.67        | 1.47±0.21 | 0.7               |
|                     | SCD-d6AE | 1.83                       | 1.26-2.55        | 1.87±0.38 |                   |

LC<sub>50</sub>, lethal concentration that kills 50% of *H. armigera* larvae; 95% FL, 95% fiducial limits of LC<sub>50</sub>; Toxicity ratio was calculated as LC<sub>50</sub> of SCD/LC<sub>50</sub> of SCD-d6AE; LC<sub>50</sub> values were considered significantly different if their fiducial limits did not overlap<sup>1</sup>.

**Supplementary Table 3**

Metabolism of xanthotoxin, 2-tridecanone and indoxacarb by CYP6AE P450s.

| P450     | <i>V</i> (pmol substrate/min/pmol P450) |               |            |
|----------|-----------------------------------------|---------------|------------|
|          | Xanthotoxin                             | 2-Tridecanone | Indoxacarb |
| CYP6AE11 | n.d.                                    | 0.56±0.08     | n.d.       |
| CYP6AE14 | n.d.                                    | 0.34±0.04     | n.d.       |
| CYP6AE16 | n.d.                                    | n.d.          | n.d.       |
| CYP6AE17 | n.d.                                    | n.d.          | 0.21±0.03  |
| CYP6AE18 | n.d.                                    | n.d.          | 0.11±0.01  |
| CYP6AE12 | n.d.                                    | n.d.          | n.d.       |
| CYP6AE15 | n.d.                                    | n.d.          | n.d.       |
| CYP6AE24 | n.d.                                    | n.d.          | n.d.       |
| CYP6AE19 | 3.32±0.43                               | 0.56±0.07     | n.d.       |
| CYP6AE20 | n.d.                                    | n.d.          | n.d.       |
| CYP6B1   | 12.71±0.23                              | n.d.          | -          |

“n.d.” means the activity was not detected (limits of detection were 0.081, 0.033 and 0.016 pmol/min/pmol P450 for xanthotoxin, 2-tridecanone and indoxacarb, respectively). “-” means the activity was not tested.

**Supplementary Table 4**

Quantitative real-time PCR analysis of expression of CYP6AE subfamily genes in the larval midgut and fat body of *H. armigera* SCD strain. Gene expression values are indicated as expression folds in the larvae exposed to each xenobiotic compared with unexposed larvae (control).

| Tissue   | P450 name | Control   | Xanthotoxin | 2-Tridecanone | Gossypol   | Esfenvalerate |
|----------|-----------|-----------|-------------|---------------|------------|---------------|
| Midgut   | CYP6AE11  | 1.00±0.24 | 0.19±0.03   | 1.67±0.35     | 0.65±0.16  | 0.94±0.37     |
|          | CYP6AE14  | 1.00±0.21 | 5.28±1.52   | 2.85±0.57     | 40.47±9.36 | 5.06±1.97     |
|          | CYP6AE16  | 1.00±0.09 | 0.33±0.04   | 0.65±0.09     | 0.35±0.04  | 0.83±0.16     |
|          | CYP6AE17  | 1.00±0.09 | 0.67±0.06   | 1.57±0.35     | 0.53±0.11  | 1.01±0.23     |
|          | CYP6AE18  | 1.00±0.37 | 15.70±4.77  | 2.38±1.30     | 1.00±0.10  | 0.73±0.10     |
|          | CYP6AE12  | 1.00±0.16 | 0.93±0.19   | 1.14±0.14     | 1.63±0.37  | 2.32±0.39     |
|          | CYP6AE15  | 1.00±0.19 | 0.10±0.04   | 0.49±0.23     | 0.40±0.08  | 1.10±0.39     |
|          | CYP6AE24  | 1.00±0.16 | 0.61±0.22   | 1.21±0.62     | 2.47±0.80  | 0.39±0.09     |
|          | CYP6AE19  | 1.00±0.20 | 7836±448    | 3.11±0.32     | 2.34±0.61  | 8.75±3.80     |
|          | CYP6AE20  | 1.00±0.09 | 14523±6650  | 0.73±0.13     | 0.83±0.07  | 1.00±0.12     |
| Fat body | CYP6AE11  | 1.00±0.29 | 3.08±0.35   | 2.02±1.58     | 0.40±0.24  | 0.36±0.17     |
|          | CYP6AE14  | 0.00      | 0.00        | 0.00          | 0.00       | 0.00          |
|          | CYP6AE16  | 1.00±0.13 | 0.72±0.10   | 0.57±0.08     | 0.64±0.11  | 0.46±0.08     |
|          | CYP6AE17  | 1.00±0.15 | 1.28±0.18   | 1.05±0.24     | 1.53±0.23  | 0.86±0.21     |
|          | CYP6AE18  | 1.00±0.27 | 1.04±0.60   | 1.72±0.97     | 2.67±1.14  | 2.10±1.07     |
|          | CYP6AE12  | 1.00±0.12 | 0.46±0.07   | 0.74±0.11     | 0.83±0.13  | 0.69±0.06     |
|          | CYP6AE15  | 1.00±0.09 | 4.84±1.29   | 1.35±0.58     | 2.21±0.75  | 1.31±0.37     |
|          | CYP6AE24  | 1.00±0.20 | 0.65±0.25   | 0.80±0.18     | 0.65±0.14  | 1.01±0.32     |
|          | CYP6AE19  | 1.00±0.26 | 250±14      | 0.81±0.11     | 2.21±0.40  | 1.45±0.52     |
|          | CYP6AE20  | 1.00±0.06 | 173±55      | 0.99±0.27     | 0.64±0.09  | 0.76±0.14     |



**Supplementary Table 5**  
PCR primers used in this study.

| Purpose                                  | Primer name | Sequence (5'-3')                      |
|------------------------------------------|-------------|---------------------------------------|
| Preparation of template DNAs for sgRNAs  | sgCYP6AE14F | TAATACGACTCACTATAGTTTCCCAACGTACCATACG |
|                                          | sgCYP6AE14R | TTCTAGCTCTAAAACCGTATGGTACGTTGGGAAAC   |
|                                          | sgCYP6AE12F | TAATACGACTCACTATAGGATCTTGGACGATGAGCGC |
|                                          | sgCYP6AE12R | TTCTAGCTCTAAAACGCGCTCATCGTCCAAGATCC   |
| Detection of the CYP6AE cluster deletion | 14F         | AAACCTTCCCTGTCCGCAT                   |
|                                          | 12R         | AGATGGCCAAATAGCCCGAG                  |
|                                          | 20f         | ACACCATGGCACCAATCCAT                  |
|                                          | 20r         | CAGATGTCTCGTAACCCGCA                  |
|                                          | 15f         | GGCATTTTTAGCGCACGTCA                  |
|                                          | 15r         | TTGCTAGCACTGGGTACAGC                  |
|                                          | 12f         | CCGCATTTGAAACCAGTCCC                  |
|                                          | 12r         | AGCCCGAGCAACATTCTTGA                  |
| RT-qPCR analysis <sup>2</sup>            | CYP6AE11-F  | AAAAGTTCCCCAAAGCCCCA                  |
|                                          | CYP6AE11-R  | CTCACGGCCACTGAAGAAGT                  |
|                                          | CYP6AE12-F  | ACCCAGTACTAGGGCTCCTG                  |
|                                          | CYP6AE12-R  | TAGGACCTTCACCAAACGGC                  |
|                                          | CYP6AE14-F  | ATGTTAAGCCGGGTCCAAGG                  |
|                                          | CYP6AE14-R  | AAGTGGTGGCCGAAGTTTCA                  |
|                                          | CYP6AE15-F  | GAATCAGCGGCGAAAGTGAC                  |
|                                          | CYP6AE15-R  | TTGCTAGCACTGGGTACAGC                  |
|                                          | CYP6AE16-F  | GACAAATTCCCGAACGCACC                  |
|                                          | CYP6AE16-R  | TGAACTCCGCTACTTCACGG                  |
|                                          | CYP6AE17-F  | GACCGTACACCTACATGCCC                  |
|                                          | CYP6AE17-R  | TGGCGTGAACCTCACTTTTG                  |
|                                          | CYP6AE18-F  | CAGACCATACACCTACATGCCA                |
|                                          | CYP6AE18-R  | CCGAGAAGTCTACGGTCGTG                  |
|                                          | CYP6AE19-F  | TGTGCCGTACCACAAACCTT                  |
|                                          | CYP6AE19-R  | CCGCAGTAGTCTGTGCACTC                  |
|                                          | CYP6AE20-F  | CGCTTTTGGGCAATTACGCT                  |
|                                          | CYP6AE20-R  | CCATCGGTCTCCTGCATTGA                  |
|                                          | CYP6AE24-F  | GGGGTCGACTGCTCAAGAAA                  |
|                                          | CYP6AE24-R  | GCAGCAAAGAACACGAAGCA                  |

|                  |                        |
|------------------|------------------------|
| Ha-actin-F       | CCTGGTATTGCTGACCGTATGC |
| Ha-actin-R       | CTGTTGGAAGGTGGAGAGGGAA |
| EF-1 $\alpha$ -F | GACAAACGTACCATCGAGAAG  |
| EF-1 $\alpha$ -R | GATACCAGCCTCGAACTCAC   |

---

**Supplementary Table 6**

Analysis parameters for substrate detection.

---

| Substrates    | Parent ion (m/z) | Daughter ions (m/z) | Cone voltage (V) | Collision energy (V) |
|---------------|------------------|---------------------|------------------|----------------------|
| Xanthotoxin   | 217              | 202*<br>189         | 30               | 20                   |
| 2-Tridecanone | 199.2            | 69*<br>83           | 30               | 10                   |
| Indoxacarb    | 528.2            | 150.1*<br>218.1     | 25               | 23                   |

---

\* quantitative daughter ions.

## Supplementary References

1. Payton ME, Greenstone MH, Schenker, N (2003) Overlapping confidence intervals or standard error intervals: what do they mean in terms of statistical significance? *J Insect Sci* 3:34.
2. Shi Y, et al. (2018) Phylogenetic and functional characterization of ten P450 genes from the CYP6AE subfamily of *Helicoverpa armigera* involved in xenobiotic metabolism. *Insect Biochem Mol Biol* 93:79-91.
